# Supplementary material
Source: publisher figshare collection journal article supplement (https://wiley.figshare.com/articles/dataset/_/6220436)
Supplement: Supplementary file 1 [file 1]

Archive with 5 entries (5 files):
- zh7-PG-00131-2017-s01.pdf
- zh7-PG-00131-2017-s02.docx
- zh7-PG-00131-2017-s03.pdf
- zh7-PG-00131-2017-s04.pdf
- zh7-PG-00131-2017-s05.pdf
