# Supplementary material
Source: publisher figshare collection journal article supplement (https://wiley.figshare.com/articles/dataset/_/6220436)

Supporting Figure 1

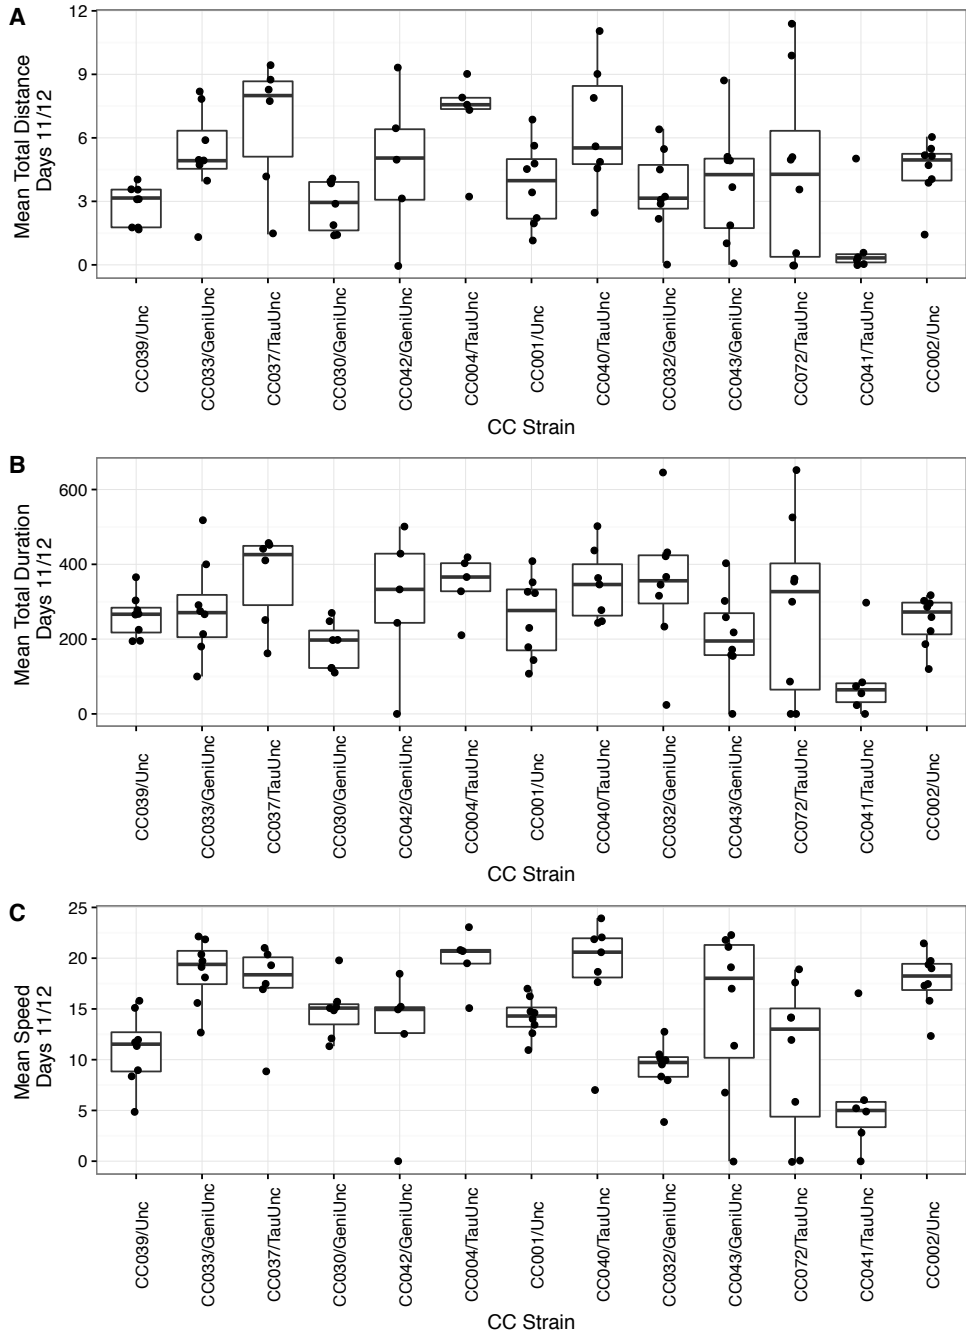

Supporting Figure 2

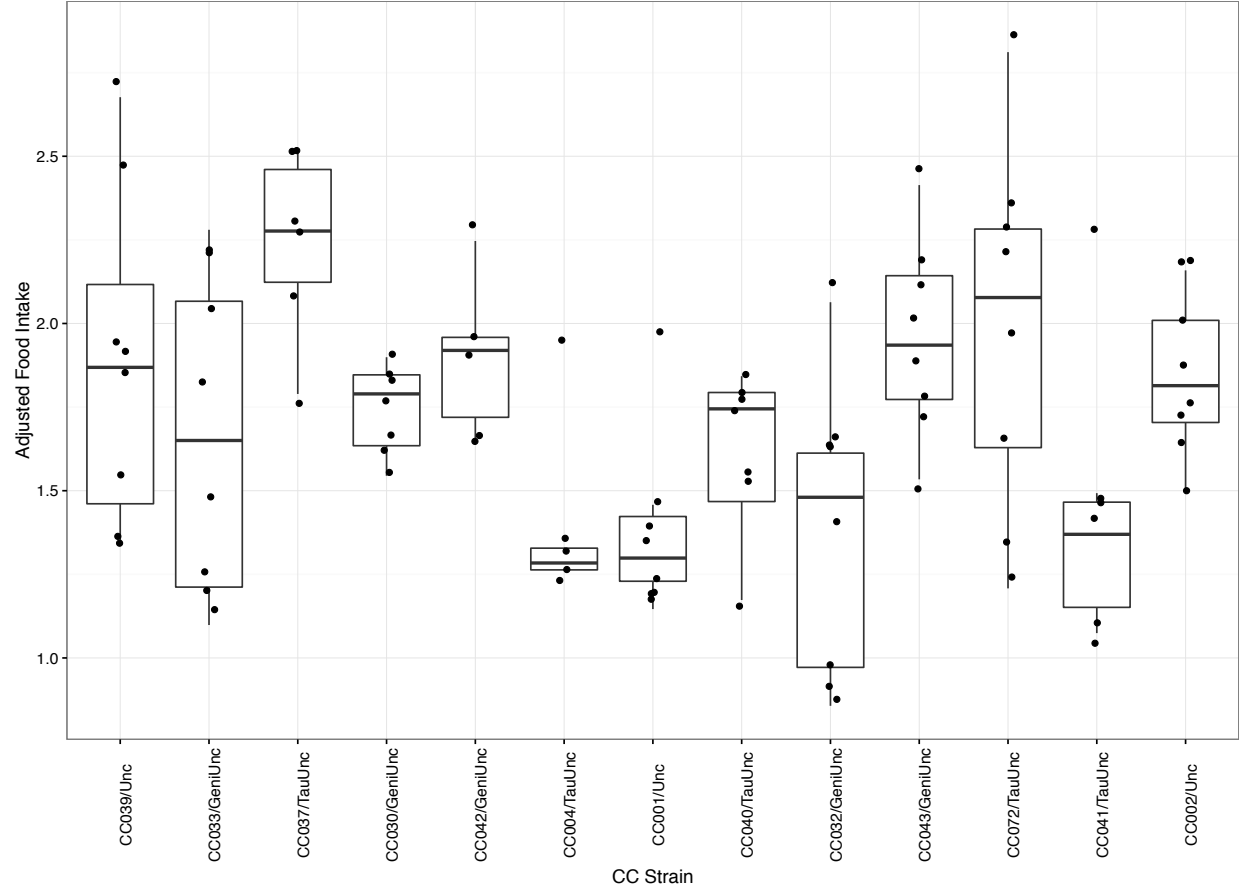

Supporting Figure 3:

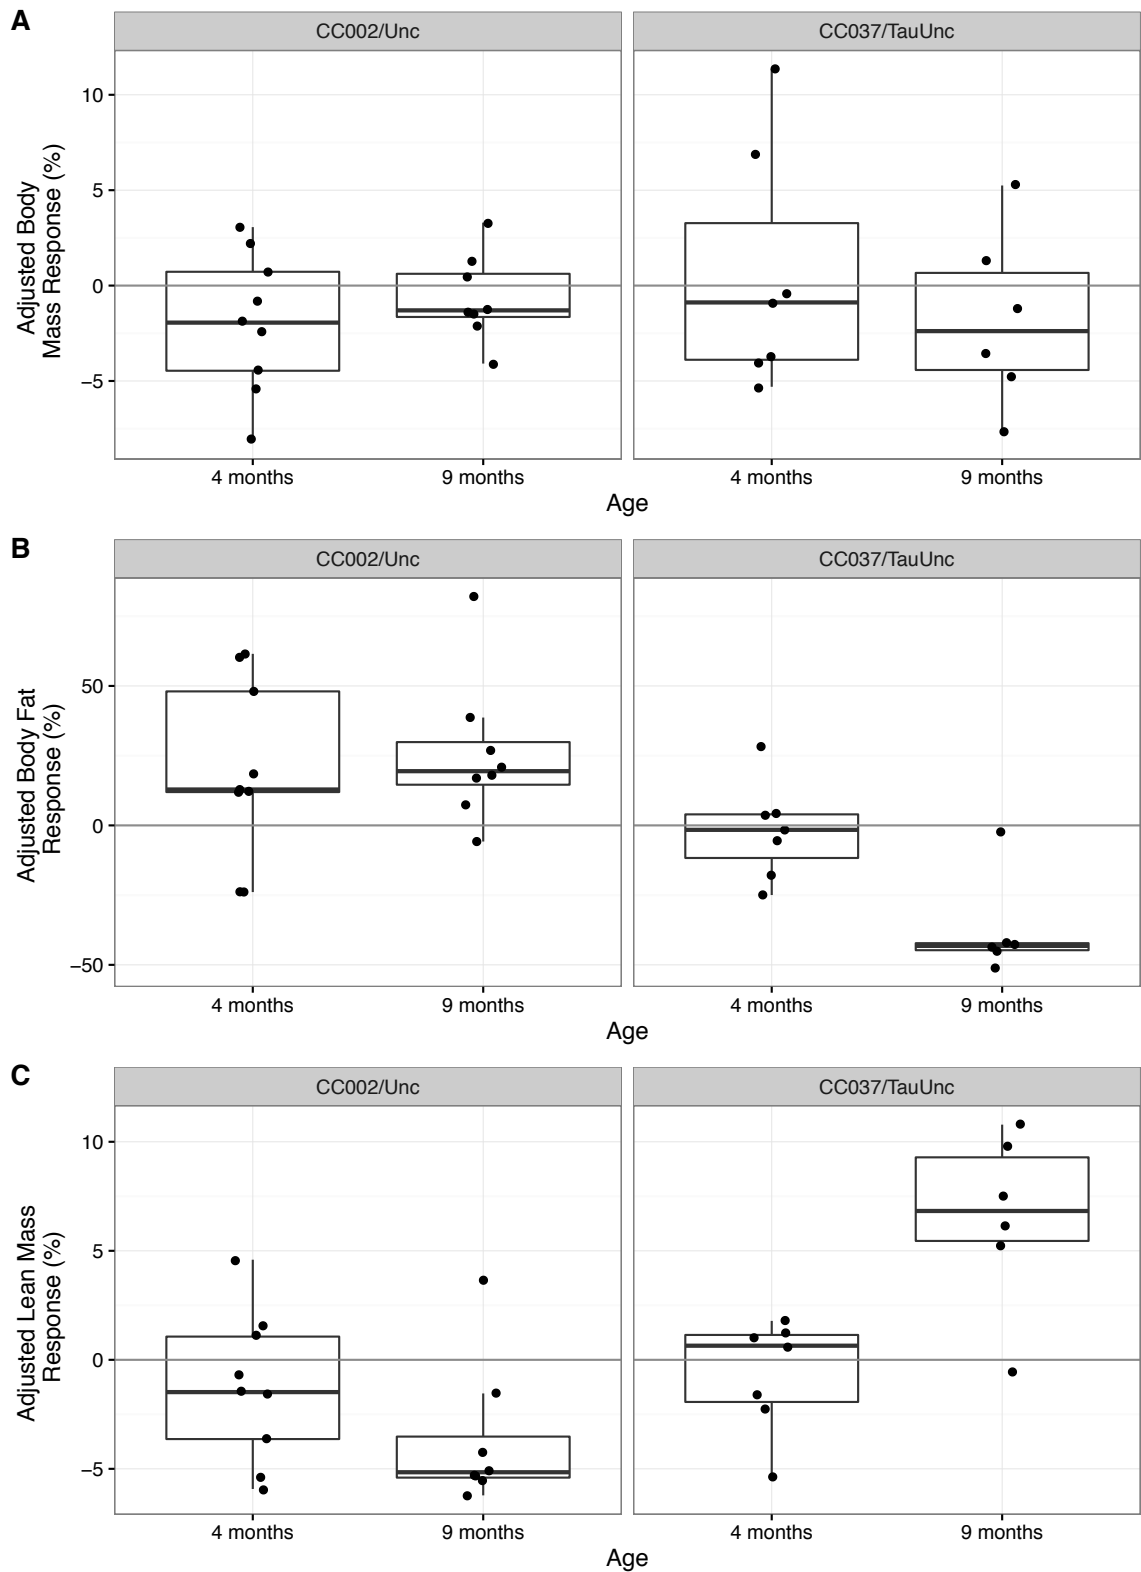

Supporting Figure 4

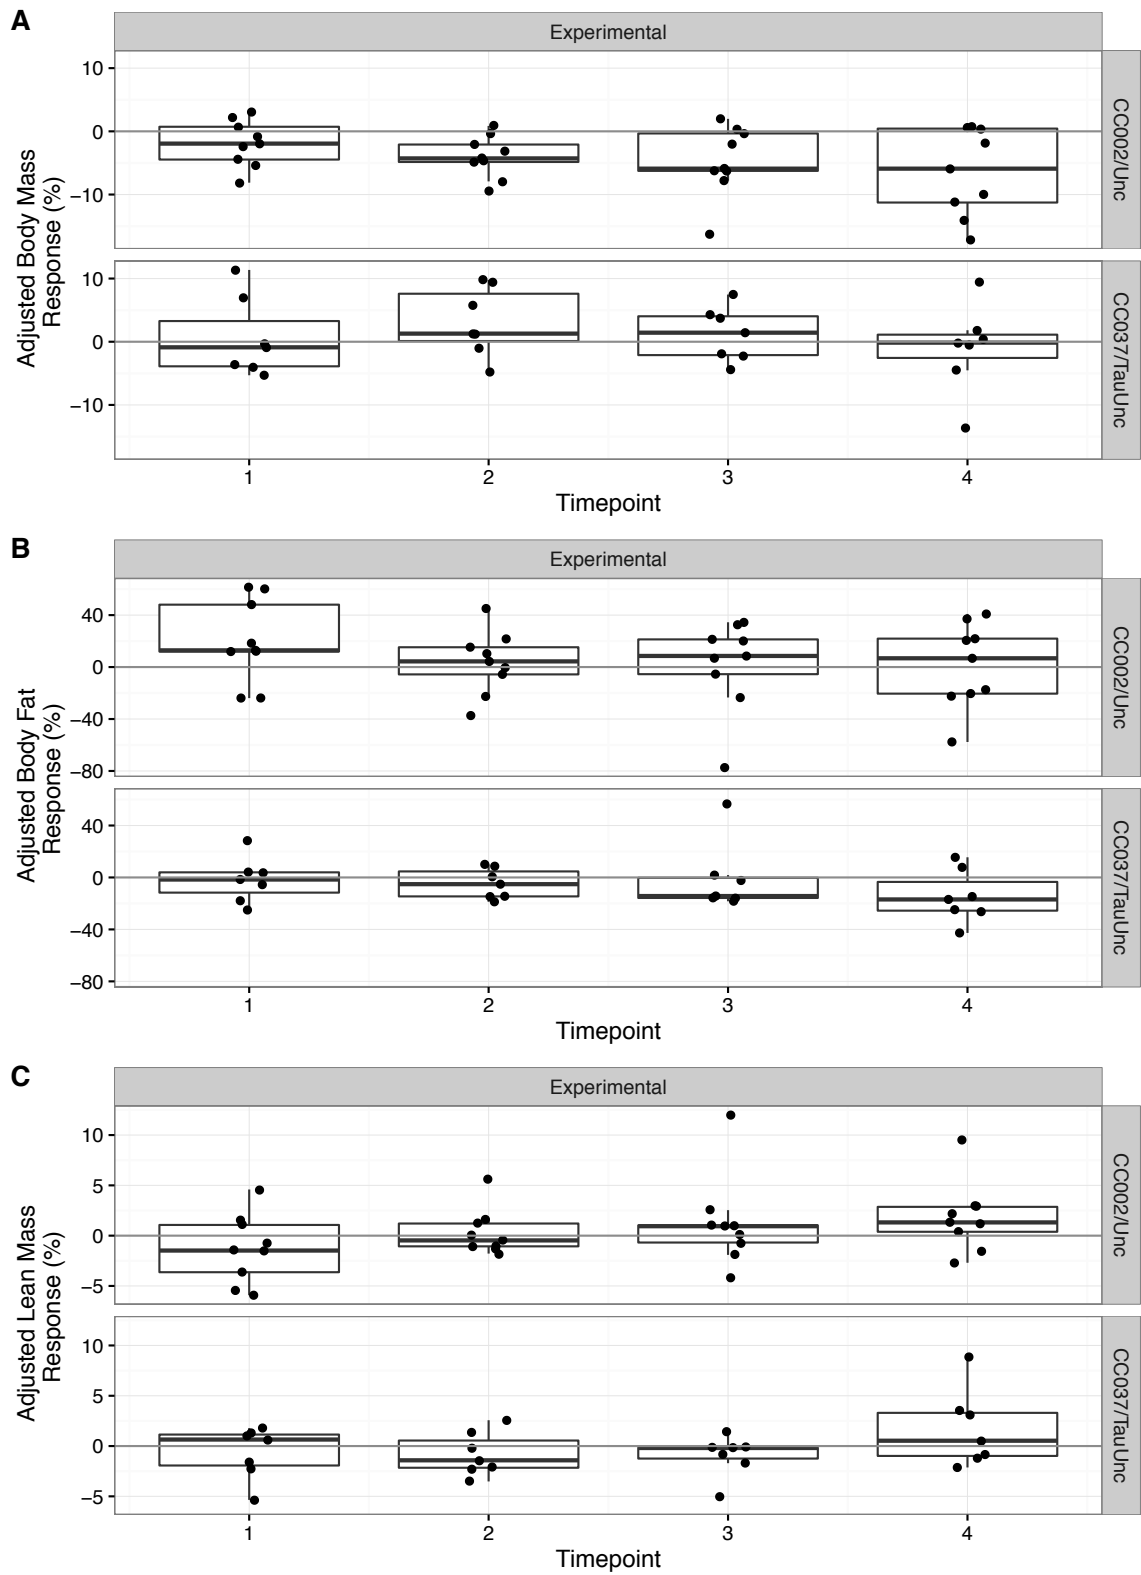

Supporting Figure 5

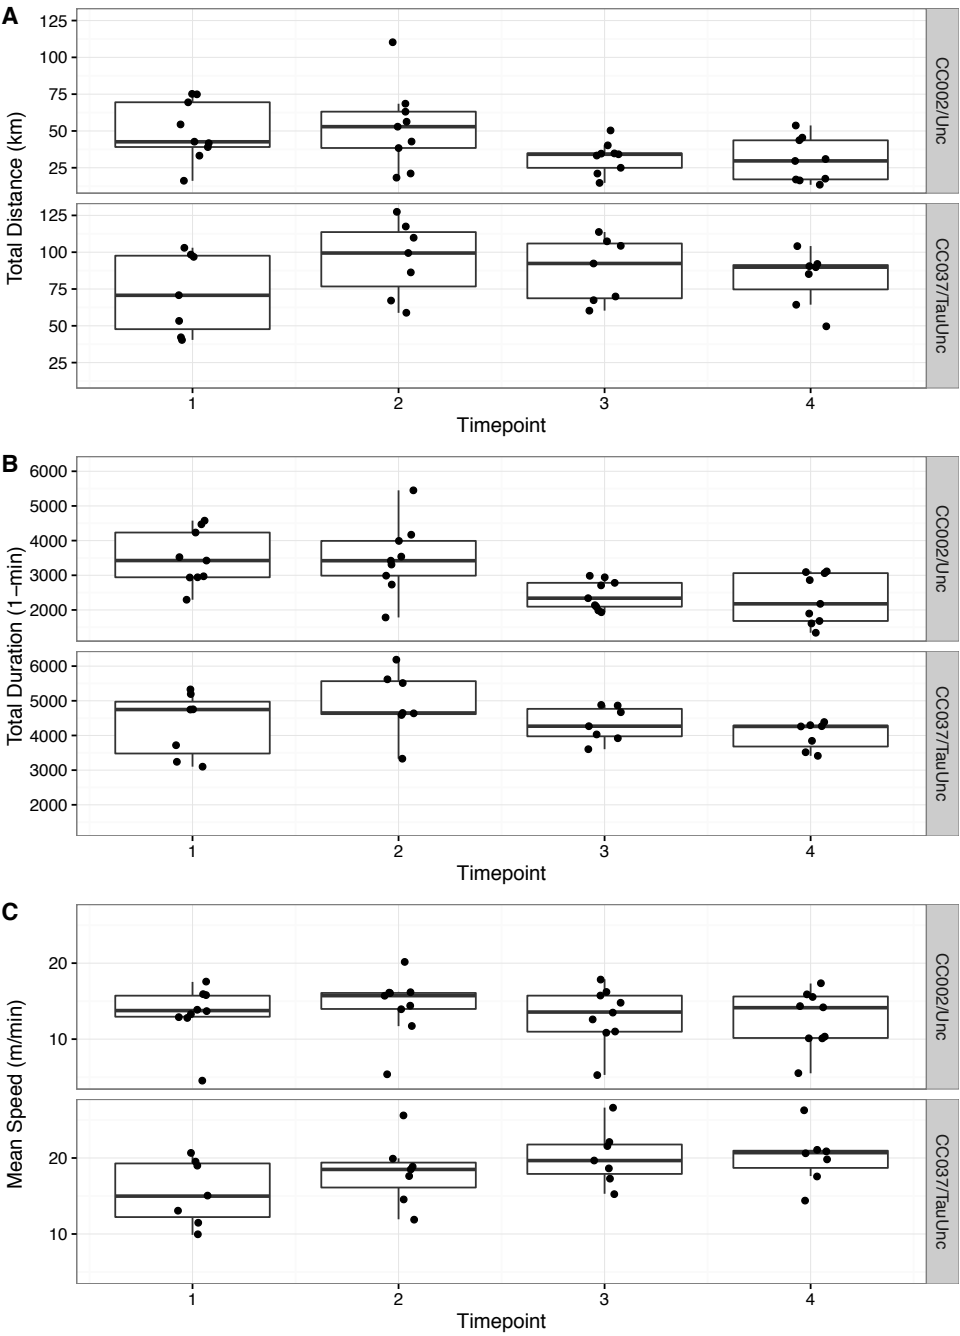

Supporting Figure 6

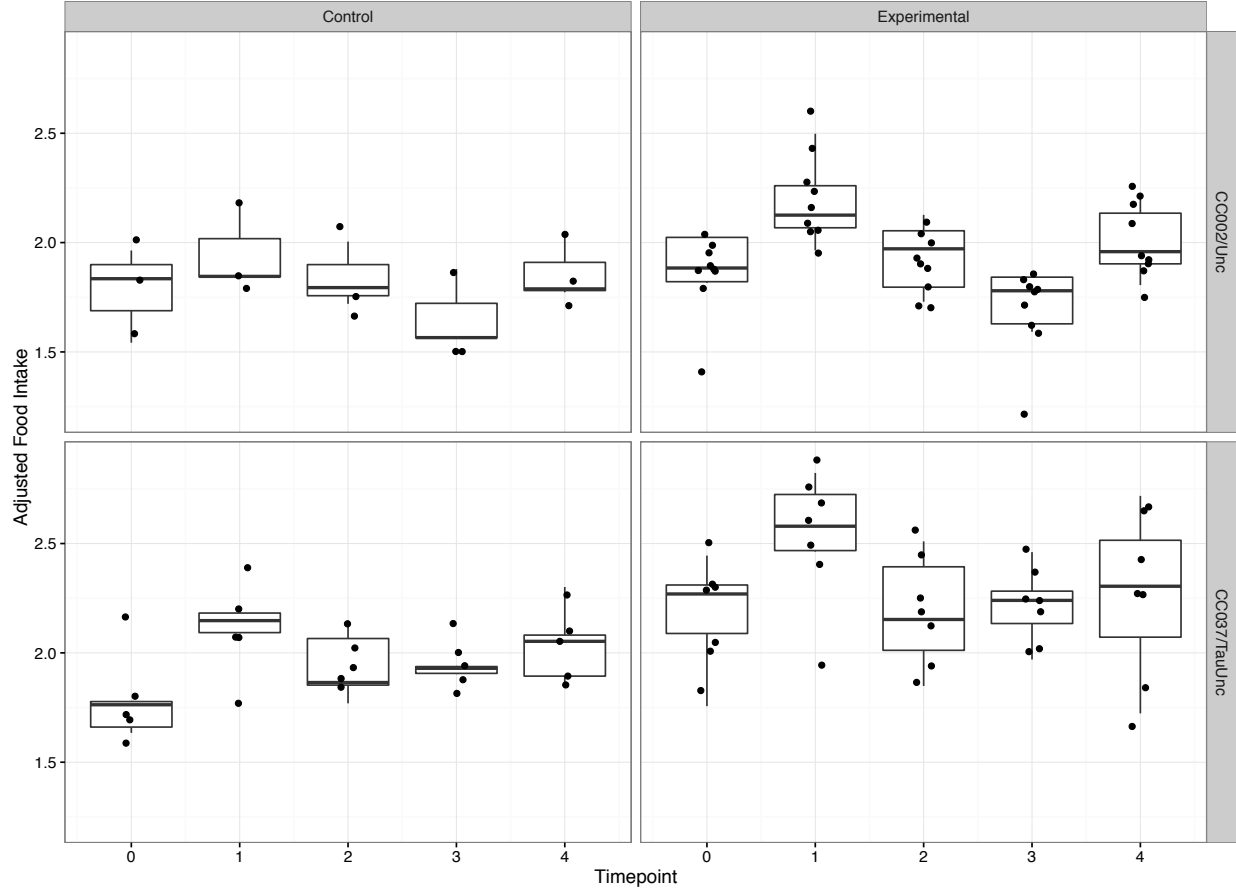

Supplement: Supplementary file 1 [file 1 › zh7-PG-00131-2017-s01.pdf]
