# Supplementary material
Source: publisher figshare collection journal article supplement (https://wiley.figshare.com/articles/dataset/_/6220436)

**Supporting Figures (to address reviewer comments)**

**Supporting Figure 7** Body fat responses in the control cohort by housing conditions (single vs group) and strain in experiment 1.

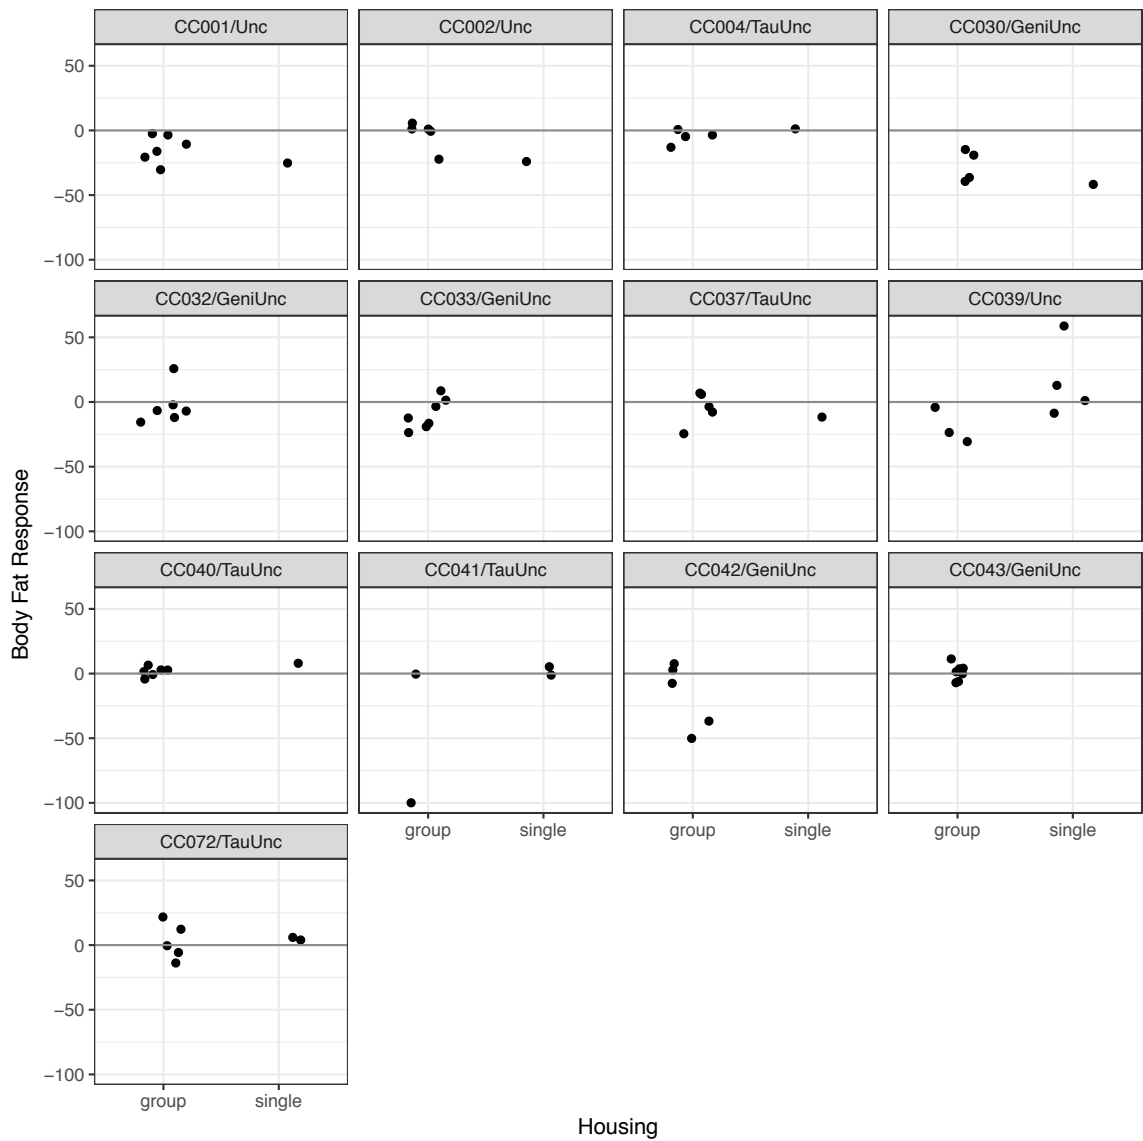

**Supporting Figure 8** Body mass responses in the control cohort by housing conditions (single vs group) and strain in experiment 1.

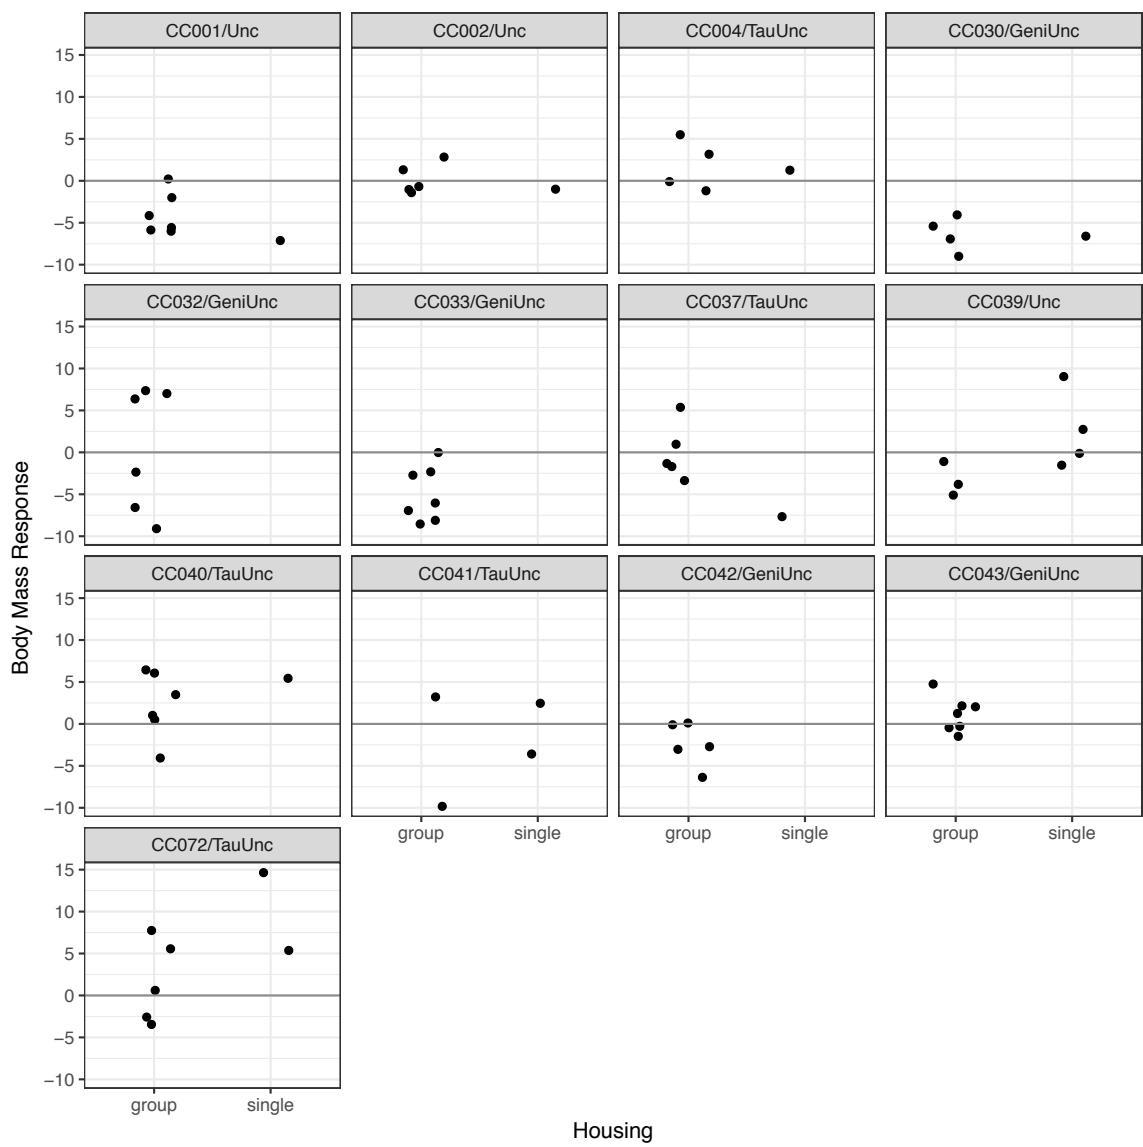

**Supporting Figure 9** Lean mass responses in the control cohort by housing conditions (single vs group) and strain in experiment 1.

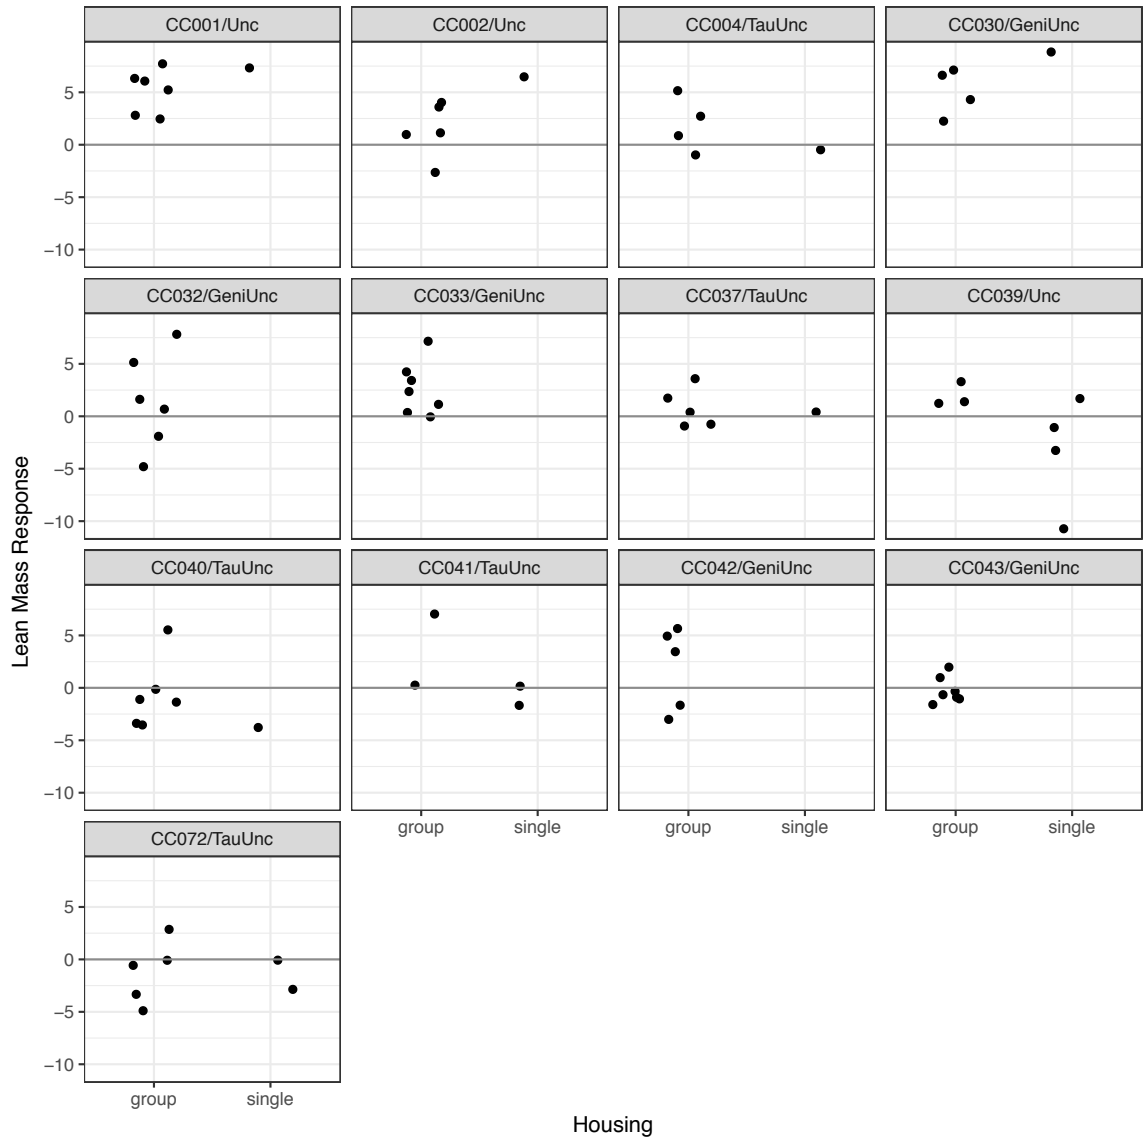

**Supporting Figure 10:** Baseline body mass and composition in both experimental and control cohorts for experiment 1.

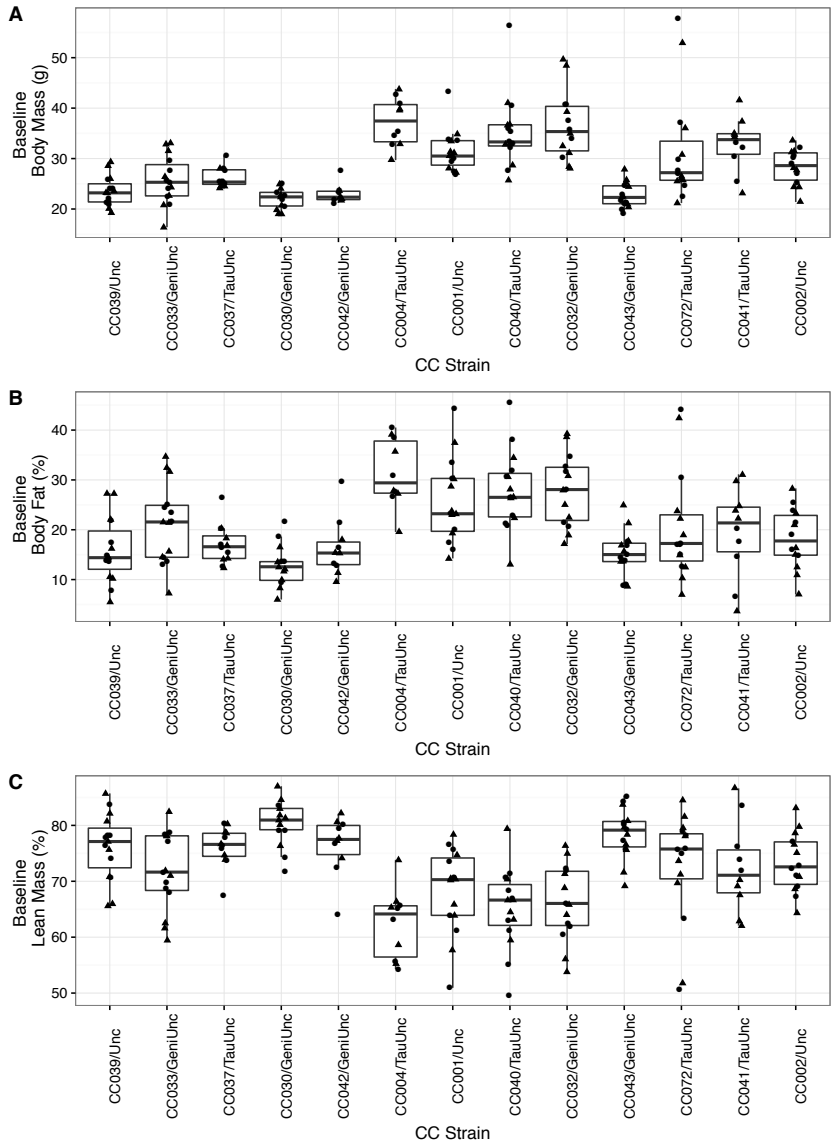

**Supporting Figure 11:** Baseline body mass and composition before single housing and before wheel access in both experimental and control cohorts in experiment 2.

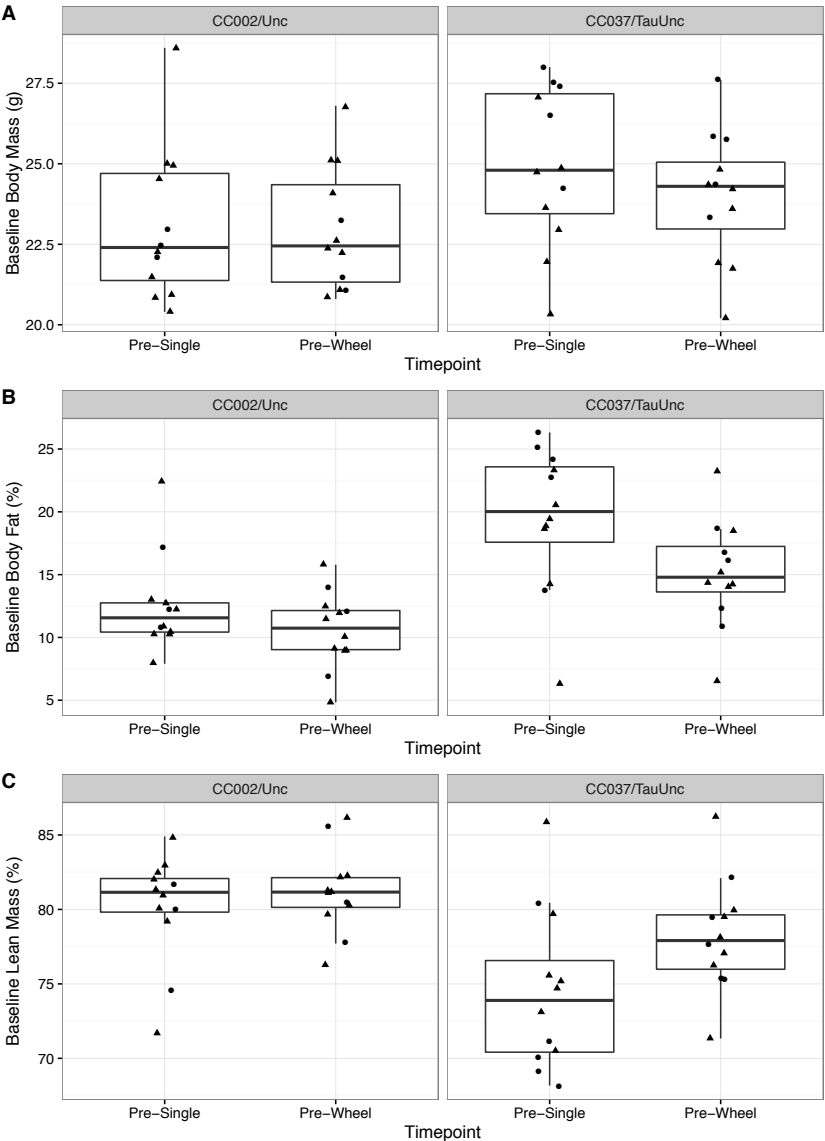

**Supporting Figure 12** Baseline body mass and composition in experiment 3

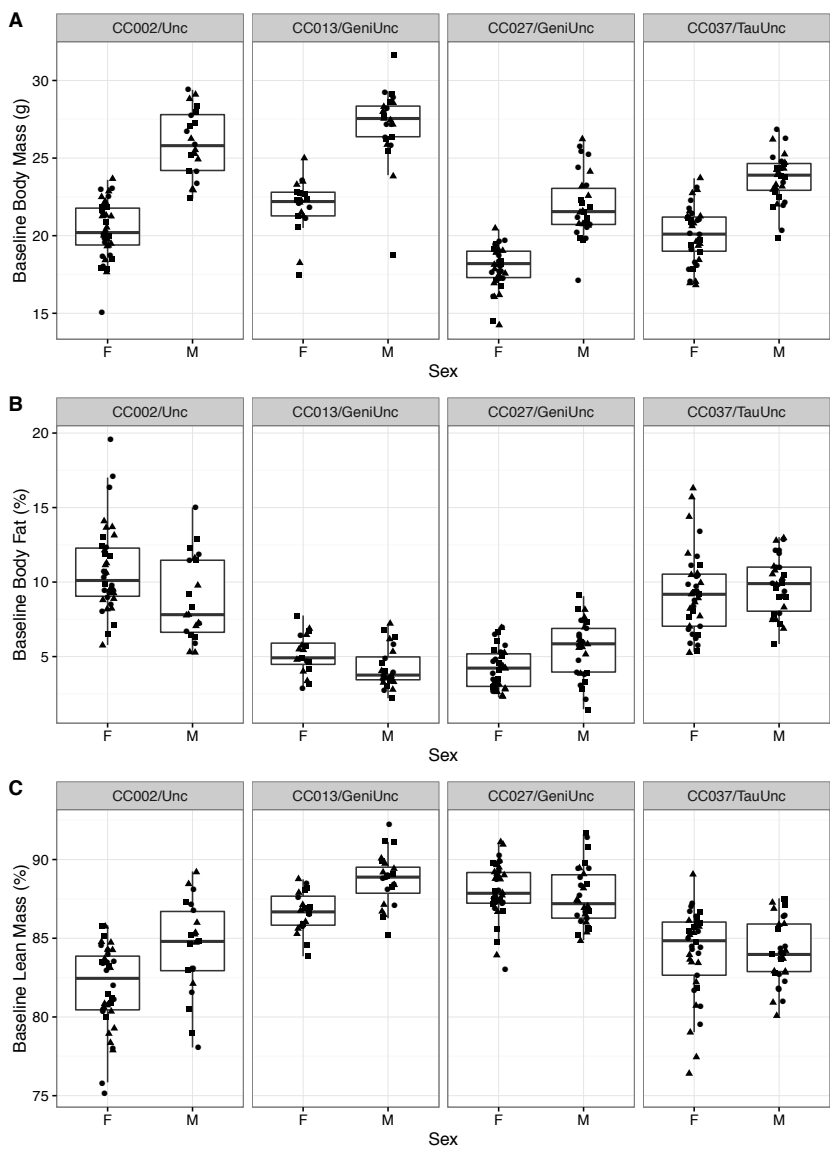

**Supporting Figure 13** Baseline body fat vs body fat response in experiment 1

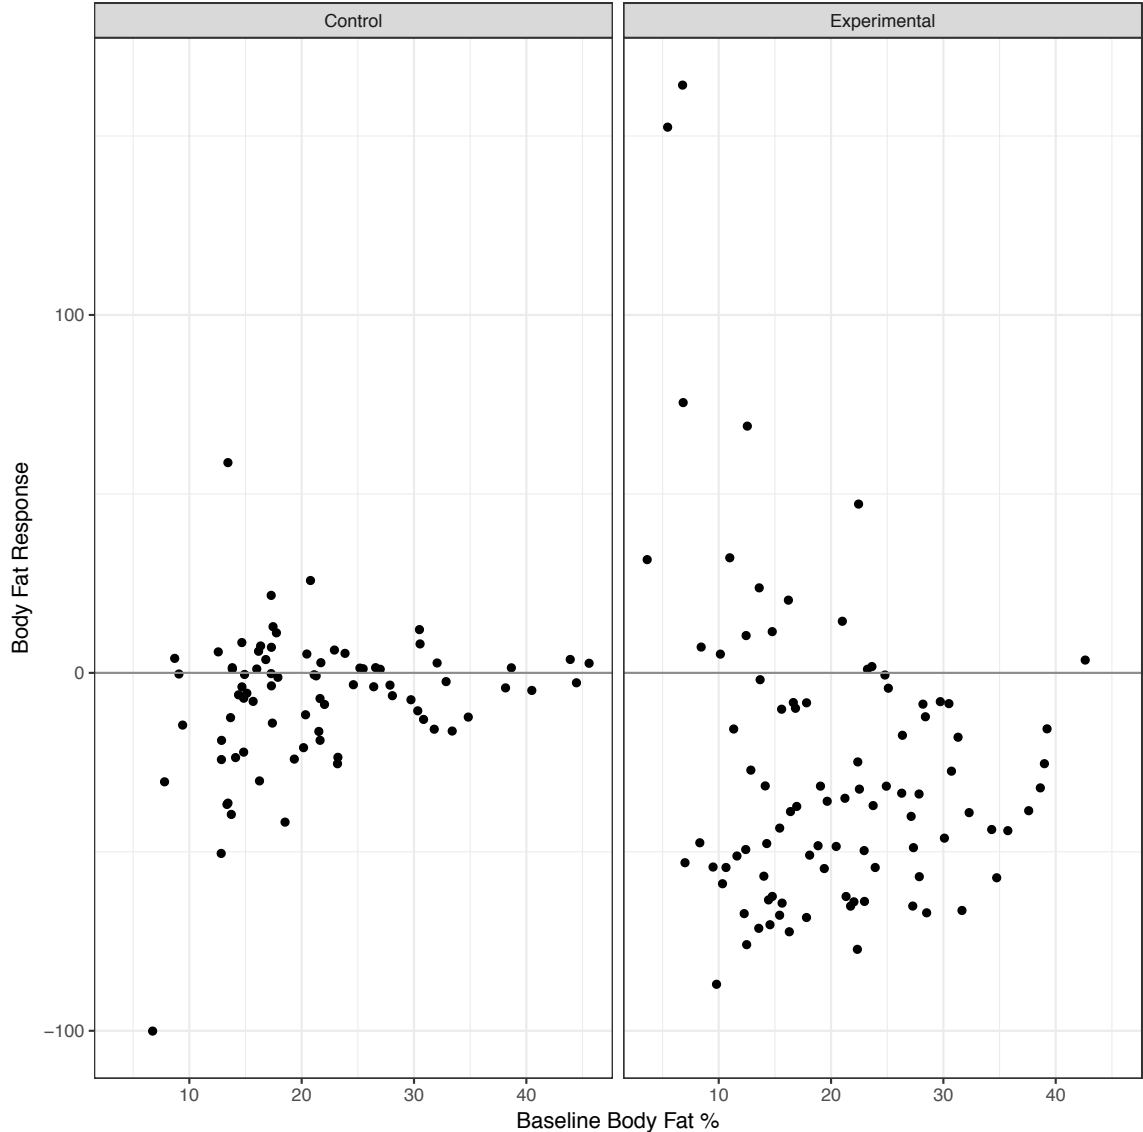

**Supporting Figure 14** Baseline body mass vs body mass response in experiment 1

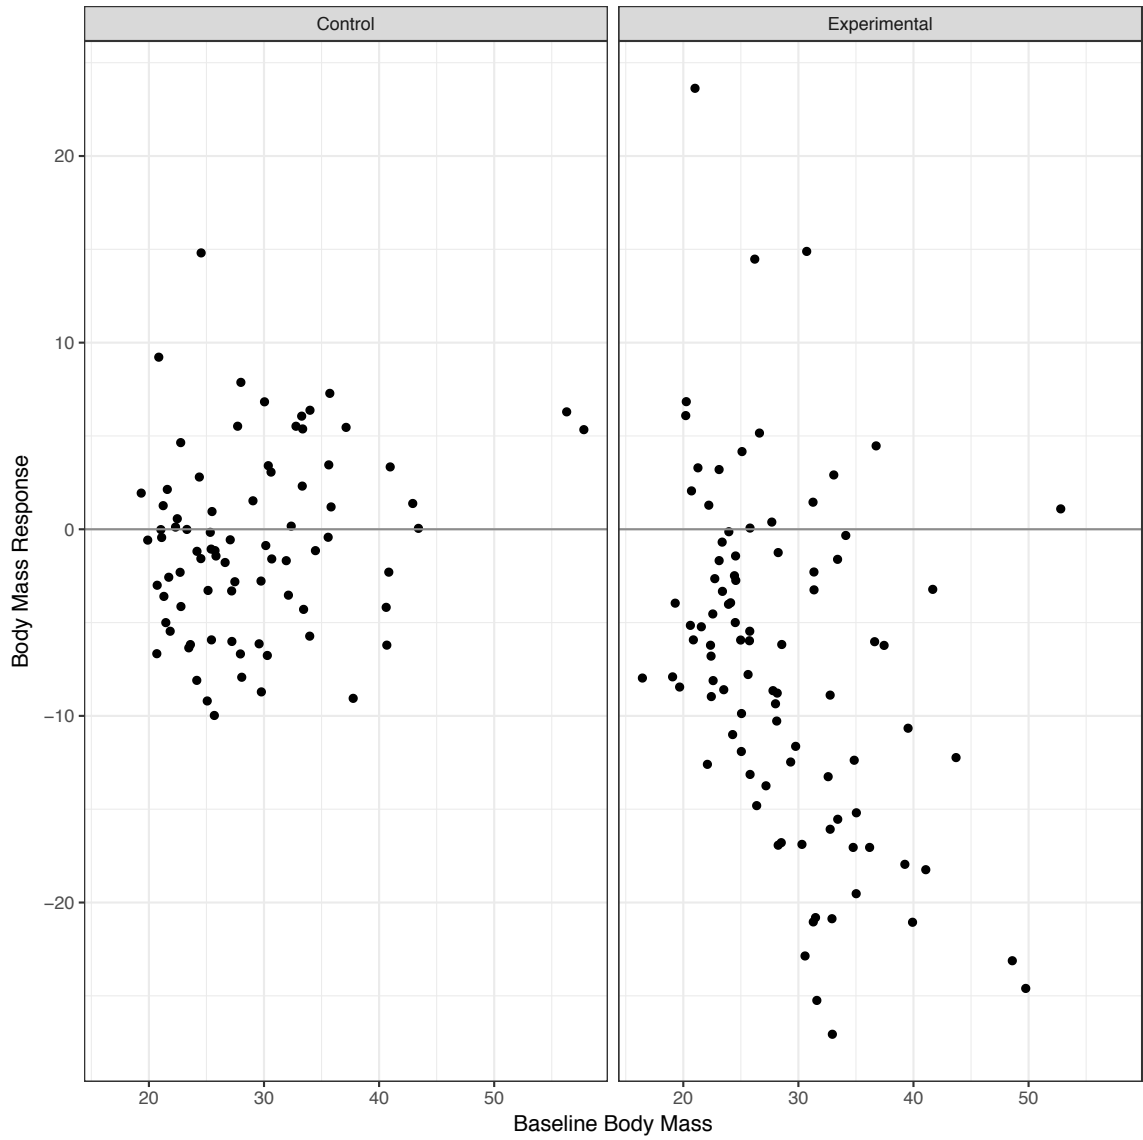

**Supporting Figure 15** Baseline lean mass vs lean mass response in experiment 1

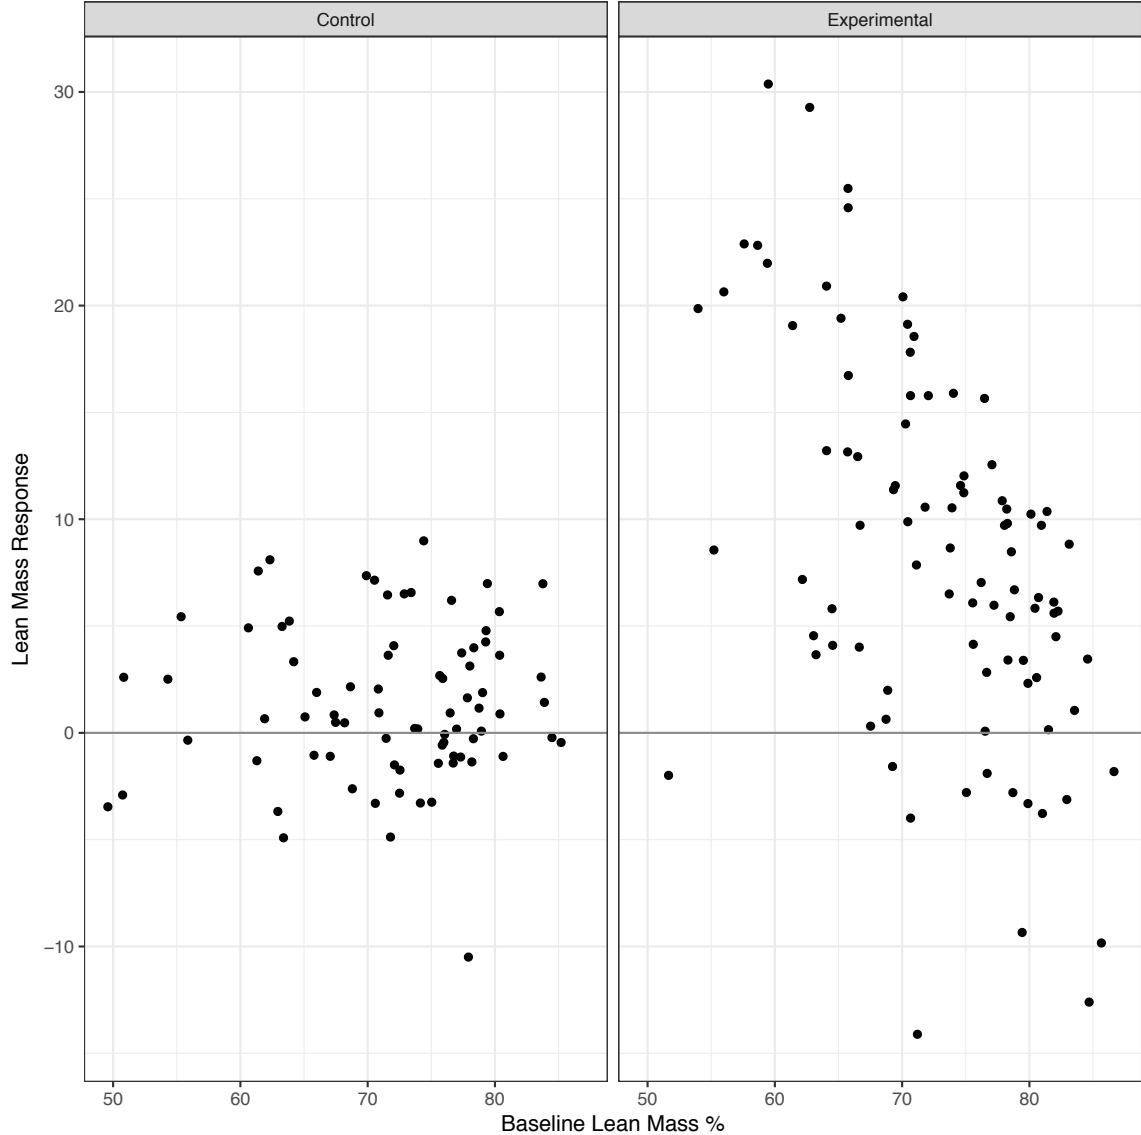

Supplement: Supplementary file 1 [file 1 › zh7-PG-00131-2017-s03.pdf]
