# Supplementary material
Source: publisher figshare collection journal article supplement (https://wiley.figshare.com/articles/dataset/_/6220436)
Supplement: Supplementary file 1 [file 1 › zh7-PG-00131-2017-s04.pdf]

**Supporting Table 1: Treadmill protocols for three days of acclimation.** Interval length represents the length of each interval in seconds. Start speed is the speed (m/min) at which the interval begins at and end speed is the speed at which the interval ends. Interval distance is the distance (m) covered during each interval. Day 1 covers 129 m total, day 2 covers 185m total and day 3 covers 290.5m.

| Acclimation Day 1    |                     |                   |                     |                       |                                                |                                               |
|----------------------|---------------------|-------------------|---------------------|-----------------------|------------------------------------------------|-----------------------------------------------|
| Angle of Inclination | 5°                  |                   |                     |                       |                                                |                                               |
| Step                 | Start Speed (m/min) | End Speed (m/min) | Interval Length (s) | Interval Distance (m) | Total distance accumulated after this step (m) | Total Running Time (at end of this step; min) |
| 1                    | 0                   | 3                 | 30                  | 0.75                  | 0.75                                           | 0.5                                           |
| 2                    | 3                   | 6                 | 90                  | 6.75                  | 7.5                                            | 2                                             |
| 3                    | 6                   | 9                 | 180                 | 22.5                  | 30                                             | 5                                             |
| 4                    | 9                   | 9                 | 600                 | 90                    | 120                                            | 15                                            |
| 5                    | 9                   | 0                 | 120                 | 9                     | 129                                            | 17                                            |

| Acclimation Day 2    |                     |                   |                     |                       |                                                |                                               |
|----------------------|---------------------|-------------------|---------------------|-----------------------|------------------------------------------------|-----------------------------------------------|
| Angle of Inclination | 10°                 |                   |                     |                       |                                                |                                               |
| Step                 | Start Speed (m/min) | End Speed (m/min) | Interval Length (s) | Interval Distance (m) | Total distance accumulated after this step (m) | Total Running Time (at end of this step; min) |
| 1                    | 0                   | 3                 | 30                  | 0.75                  | 0.75                                           | 0.5                                           |
| 2                    | 3                   | 6                 | 90                  | 6.75                  | 7.5                                            | 2                                             |
| 3                    | 6                   | 9                 | 180                 | 22.5                  | 30                                             | 5                                             |
| 4                    | 9                   | 9                 | 600                 | 90                    | 120                                            | 15                                            |
| 5                    | 9                   | 16                | 120                 | 25                    | 145                                            | 17                                            |
| 6                    | 16                  | 16                | 120                 | 32                    | 177                                            | 19                                            |
| 7                    | 16                  | 0                 | 60                  | 8                     | 185                                            | 20                                            |

| Acclimation Day 3    |                     |                   |                     |                       |                                                |                                               |
|----------------------|---------------------|-------------------|---------------------|-----------------------|------------------------------------------------|-----------------------------------------------|
| Angle of Inclination | 15°                 |                   |                     |                       |                                                |                                               |
| Step                 | Start Speed (m/min) | End Speed (m/min) | Interval Length (s) | Interval Distance (m) | Total distance accumulated after this step (m) | Total Running Time (at end of this step; min) |
| 1                    | 0                   | 3                 | 30                  | 0.75                  | 0.75                                           | 0.5                                           |
| 2                    | 3                   | 6                 | 90                  | 6.75                  | 7.5                                            | 2                                             |
| 3                    | 6                   | 9                 | 180                 | 22.5                  | 30                                             | 5                                             |
| 4                    | 9                   | 9                 | 60                  | 9                     | 39                                             | 6                                             |
| 5                    | 9                   | 16                | 60                  | 12.5                  | 51.5                                           | 7                                             |
| 6                    | 16                  | 16                | 180                 | 48                    | 99.5                                           | 10                                            |
| 7                    | 16                  | 18                | 180                 | 51                    | 150.5                                          | 13                                            |
| 8                    | 18                  | 18                | 120                 | 36                    | 186.5                                          | 15                                            |
| 9                    | 18                  | 20                | 180                 | 57                    | 243.5                                          | 18                                            |
| 10                   | 20                  | 20                | 120                 | 38                    | 281.5                                          | 20                                            |
| 11                   | 18                  | 0                 | 60                  | 9                     | 290.5                                          | 21                                            |

**Supporting Table 2: Maximum endurance speed for each CC strain and sex.** Max Speed (m/min) for each mouse is reported for both testing days. Mean strain speed (m/min) was calculated as a mean for each strain and sex across all maximum endurance speeds collected within the strain-by-sex groups. Protocol group represents the strains and sexes that will be running through exercise programs together and are matched by sex and maximum endurance speed abilities. Protocol group mean speed (m/min) is calculated as the mean speed for protocol groups with more than one strain. Speeds for the training programs are calculated using the protocol group mean speed.

| CC Strain     | Sex | Endurance Testing Day | Max Speed (m/min) |         |         | Mean Strain Speed (m/min) | Protocol Group | Protocol Group Mean Speed (m/min) | Calculated Speeds for Training Protocols |      |       |
|---------------|-----|-----------------------|-------------------|---------|---------|---------------------------|----------------|-----------------------------------|------------------------------------------|------|-------|
|               |     |                       | Mouse 1           | Mouse 2 | Mouse 3 |                           |                |                                   | 80%                                      | 20%  | 50%   |
| CC002/Unc     | F   | 1                     | 23                | 25      | 26      | 24.17                     | 1              | 24.17                             | 19.33                                    | 4.83 | 12.08 |
|               |     | 2                     | 25                | 23      | 23      |                           |                |                                   |                                          |      |       |
| CC013/GeniUnc | F   | 1                     | 39                | 28      | 30      | 33.67                     | 2              | 33.67                             | 26.93                                    | 6.73 | 16.83 |
|               |     | 2                     | 39                | 38      | 28      |                           |                |                                   |                                          |      |       |
| CC027/GeniUnc | F   | 1                     | 41                | 40      | 39      | 40.50                     | 3              | 38.42                             | 30.73                                    | 7.68 | 19.21 |
|               |     | 2                     | 43                | 38      | 42      |                           |                |                                   |                                          |      |       |
| CC037/TauUnc  | F   | 1                     | 38                | 32      | 33      | 36.33                     | 3              | 36.33                             | 28.08                                    | 5.62 | 14.04 |
|               |     | 2                     | 39                | 38      | 38      |                           |                |                                   |                                          |      |       |
| CC002/Unc     | M   | 1                     | 26                | 21      | 25      | 24.00                     | 4              | 25.58                             | 20.47                                    | 5.12 | 12.79 |
|               |     | 2                     | 27                | 20      | 25      |                           |                |                                   |                                          |      |       |
| CC013/GeniUnc | M   | 1                     | 27                | 29      | 29      | 27.17                     | 4              | 27.17                             | 22.47                                    | 5.62 | 14.04 |
|               |     | 2                     | 25                | 27      | 26      |                           |                |                                   |                                          |      |       |
| CC027/GeniUnc | M   | 1                     | 28                | 27      | 27      | 27.33                     | 5              | 28.08                             | 22.47                                    | 5.62 | 14.04 |
|               |     | 2                     | 30                | 23      | 29      |                           |                |                                   |                                          |      |       |
| CC037/TauUnc  | M   | 1                     | 32                | 30      | 26      | 28.83                     | 5              | 28.83                             | 22.47                                    | 5.62 | 14.04 |
|               |     | 2                     | 31                | 29      | 25      |                           |                |                                   |                                          |      |       |

**Supporting Table 3: Exercise Program Treadmill Protocols for HIIT and MICT for each of the 5 exercise groups.** Interval length represents the length of each interval in seconds. Start speed is the speed (m/min) at which the interval begins at and end speed is the speed at which the interval ends. Interval distance is the distance (m) covered during each interval. For each exercise group the total time (minutes) and distance (m) is listed for both HIIT and MICT programs. All HIIT programs are 33 minutes long and all MICT programs are 42 minutes long. Total distance (for both HIIT and MICT programs) for each exercise group are as follows: CC002/Unc females 480m; CC013/GeniUnc females 670m; CC027/GeniUnc and CC037/TauUnc females 764m; CC002/Unc and CC013/GeniUnc males 509m; CC027/GeniUnc and CC037/TauUnc males 559m.

| HIIT Protocols  |                     |                     |                   |                   |                     |                   |                   |                     |                   |                   |                     |                   |                   |                     |                   |                   |
|-----------------|---------------------|---------------------|-------------------|-------------------|---------------------|-------------------|-------------------|---------------------|-------------------|-------------------|---------------------|-------------------|-------------------|---------------------|-------------------|-------------------|
| Protocol Group  |                     | 1                   |                   |                   | 2                   |                   |                   | 3                   |                   |                   | 4                   |                   |                   | 5                   |                   |                   |
|                 | Interval Length (s) | Start Speed (m/min) | End Speed (m/min) | Interval Distance | Start Speed (m/min) | End Speed (m/min) | Interval Distance | Start Speed (m/min) | End Speed (m/min) | Interval Distance | Start Speed (m/min) | End Speed (m/min) | Interval Distance | Start Speed (m/min) | End Speed (m/min) | Interval Distance |
| Intervals 1 - 5 | 60                  | 0.00                | 4.83              | 2.42              | 0.00                | 6.73              | 3.37              | 0.00                | 7.68              | 3.84              | 0.00                | 5.12              | 2.56              | 0.00                | 5.62              | 2.81              |
|                 | 60                  | 4.83                | 4.83              | 4.83              | 6.73                | 6.73              | 6.73              | 7.68                | 7.68              | 7.68              | 5.12                | 5.12              | 5.12              | 5.62                | 5.62              | 5.62              |
|                 | 30                  | 4.83                | 19.30             | 6.03              | 6.73                | 26.93             | 8.42              | 7.68                | 30.73             | 9.60              | 5.12                | 20.47             | 6.40              | 5.62                | 22.47             | 7.02              |
|                 | 240                 | 19.30               | 19.30             | 77.20             | 26.93               | 26.93             | 107.72            | 30.73               | 30.73             | 122.92            | 20.47               | 20.47             | 81.88             | 22.47               | 22.47             | 89.88             |
|                 | 30                  | 19.30               | 4.83              | 6.03              | 26.93               | 6.73              | 8.42              | 30.73               | 7.68              | 9.60              | 20.47               | 5.12              | 6.40              | 22.47               | 5.62              | 7.02              |
|                 | 60                  | 4.83                | 4.83              | 4.83              | 6.73                | 6.73              | 6.73              | 7.68                | 7.68              | 7.68              | 5.12                | 5.12              | 5.12              | 5.62                | 5.62              | 5.62              |
|                 | 60                  | 4.83                | 0.00              | 2.42              | 6.73                | 0.00              | 3.37              | 7.68                | 0.00              | 3.84              | 5.12                | 0.00              | 2.56              | 5.62                | 0.00              | 2.81              |
| MICT Protocols  |                     |                     |                   |                   |                     |                   |                   |                     |                   |                   |                     |                   |                   |                     |                   |                   |
| Protocol Group  |                     | 1                   |                   |                   | 2                   |                   |                   | 3                   |                   |                   | 4                   |                   |                   | 5                   |                   |                   |
|                 | Interval Length (s) | Start Speed (m/min) | End Speed (m/min) | Interval Distance | Start Speed (m/min) | End Speed (m/min) | Interval Distance | Start Speed (m/min) | End Speed (m/min) | Interval Distance | Start Speed (m/min) | End Speed (m/min) | Interval Distance | Start Speed (m/min) | End Speed (m/min) | Interval Distance |
| Interval 1      | 120                 | 0.00                | 12.08             | 12.08             | 0.00                | 16.83             | 16.83             | 0.00                | 19.21             | 19.21             | 0.00                | 12.79             | 12.79             | 0.00                | 14.04             | 14.04             |
|                 | 2295                | 12.08               | 12.08             | 462.06            | 16.83               | 16.83             | 643.75            | 19.21               | 19.21             | 734.78            | 12.79               | 12.79             | 489.22            | 14.04               | 14.04             | 537.03            |
|                 | 60                  | 12.08               | 0.00              | 6.04              | 16.83               | 0.00              | 8.42              | 19.21               | 0.00              | 9.61              | 12.79               | 0.00              | 6.40              | 14.04               | 0.00              | 7.02              |

**Supporting Table 4.** Descriptive statistics for body mass and composition responses across 13 CC strains.

| CCStrain      | Treatment    | n | Body Mass Response |          |                         |               |           | Body Fat % Response |          |                         |               |           | Lean Mass % Response |          |                         |               |           |
|---------------|--------------|---|--------------------|----------|-------------------------|---------------|-----------|---------------------|----------|-------------------------|---------------|-----------|----------------------|----------|-------------------------|---------------|-----------|
|               |              |   | Mean               | Variance | Coefficient of Variance | Std Deviation | Std Error | Mean                | Variance | Coefficient of Variance | Std Deviation | Std Error | Mean                 | Variance | Coefficient of Variance | Std Deviation | Std Error |
| CC001/Unc     | Control      | 7 | -4.33              | 6.82     | -1.57                   | 2.61          | 0.99      | -15.64              | 111.94   | -7.16                   | 10.58         | 4.00      | 5.41                 | 4.18     | 0.77                    | 2.04          | 0.77      |
| CC002/Unc     | Control      | 6 | -0.03              | 3.18     | -117.97                 | 1.78          | 0.73      | -6.48               | 168.53   | -26.03                  | 12.98         | 5.30      | 2.30                 | 9.91     | 4.31                    | 3.15          | 1.29      |
| CC004/TauUnc  | Control      | 5 | 1.72               | 7.17     | 4.16                    | 2.68          | 1.20      | -3.82               | 34.20    | -8.94                   | 5.85          | 2.62      | 1.42                 | 6.15     | 4.34                    | 2.48          | 1.11      |
| CC030/GeniUnc | Control      | 5 | -6.37              | 3.71     | -0.58                   | 1.93          | 0.86      | -30.30              | 157.02   | -5.18                   | 12.53         | 5.60      | 5.80                 | 6.40     | 1.10                    | 2.53          | 1.13      |
| CC032/GeniUnc | Control      | 6 | 0.47               | 54.06    | 115.57                  | 7.35          | 3.00      | -2.96               | 221.58   | -74.82                  | 14.89         | 6.08      | 1.49                 | 21.02    | 14.13                   | 4.58          | 1.87      |
| CC033/GeniUnc | Control      | 7 | -4.97              | 10.99    | -2.21                   | 3.31          | 1.25      | -9.23               | 138.09   | -14.96                  | 11.75         | 4.44      | 2.69                 | 6.37     | 2.37                    | 2.52          | 0.95      |
| CC037/TauUnc  | Control      | 6 | -1.28              | 19.23    | -15.06                  | 4.39          | 1.79      | -5.80               | 138.22   | -23.85                  | 11.76         | 4.80      | 0.75                 | 2.89     | 3.86                    | 1.70          | 0.69      |
| CC039/Unc     | Control      | 7 | 0.04               | 22.43    | 577.93                  | 4.74          | 1.79      | 0.80                | 866.84   | 1080.80                 | 29.44         | 11.13     | -1.06                | 22.16    | -20.90                  | 4.71          | 1.78      |
| CC040/TauUnc  | Control      | 8 | 2.64               | 14.73    | 5.59                    | 3.84          | 1.36      | 2.37                | 16.53    | 6.98                    | 4.07          | 1.44      | -1.06                | 10.19    | -9.65                   | 3.19          | 1.13      |
| CC041/TauUnc  | Control      | 4 | -1.96              | 37.10    | -18.95                  | 6.09          | 3.05      | -24.17              | 2563.64  | -106.06                 | 50.63         | 25.32     | 1.43                 | 15.28    | 10.70                   | 3.91          | 1.95      |
| CC042/GeniUnc | Control      | 5 | -2.40              | 6.83     | -2.85                   | 2.61          | 1.17      | -16.82              | 644.75   | -38.32                  | 25.39         | 11.36     | 1.86                 | 14.80    | 7.93                    | 3.85          | 1.72      |
| CC043/GeniUnc | Control      | 7 | 1.15               | 4.80     | 4.19                    | 2.19          | 0.83      | 0.97                | 39.91    | 41.14                   | 6.32          | 2.39      | -0.21                | 1.59     | -7.44                   | 1.26          | 0.48      |
| CC072/TauUnc  | Control      | 7 | 3.97               | 40.49    | 10.21                   | 6.36          | 2.40      | 3.35                | 136.61   | 40.84                   | 11.69         | 4.42      | -1.28                | 6.76     | -5.29                   | 2.60          | 0.98      |
| CC001/Unc     | Experimental | 8 | -17.15             | 19.63    | -1.14                   | 4.43          | 1.57      | -50.75              | 141.58   | -2.79                   | 11.90         | 4.21      | 16.99                | 42.78    | 2.52                    | 6.54          | 2.31      |
| CC002/Unc     | Experimental | 8 | -0.70              | 5.17     | -7.43                   | 2.27          | 0.80      | 19.17               | 690.32   | 36.02                   | 26.27         | 9.29      | -1.40                | 10.64    | -7.63                   | 3.26          | 1.15      |
| CC004/TauUnc  | Experimental | 5 | -14.32             | 18.76    | -1.31                   | 4.33          | 1.94      | -38.49              | 227.00   | -5.90                   | 15.07         | 6.74      | 14.01                | 49.17    | 3.51                    | 7.01          | 3.14      |
| CC030/GeniUnc | Experimental | 8 | -7.07              | 10.36    | -1.47                   | 3.22          | 1.14      | -67.54              | 192.33   | -2.85                   | 13.87         | 4.90      | 9.20                 | 13.93    | 1.51                    | 3.73          | 1.32      |
| CC032/GeniUnc | Experimental | 8 | -15.55             | 47.25    | -3.04                   | 6.87          | 2.43      | -29.13              | 159.90   | -5.49                   | 12.65         | 4.47      | 11.88                | 40.13    | 3.38                    | 6.33          | 2.24      |
| CC033/GeniUnc | Experimental | 8 | -15.07             | 68.62    | -4.55                   | 8.28          | 2.93      | -58.86              | 82.49    | -1.40                   | 9.08          | 3.21      | 17.39                | 80.84    | 4.65                    | 8.99          | 3.18      |
| CC037/TauUnc  | Experimental | 6 | -3.04              | 21.08    | -6.92                   | 4.59          | 1.87      | -43.64              | 313.47   | -7.18                   | 17.71         | 7.23      | 7.25                 | 16.40    | 2.26                    | 4.05          | 1.65      |
| CC039/Unc     | Experimental | 8 | -6.31              | 61.27    | -9.71                   | 7.83          | 2.77      | -31.03              | 5594.76  | -180.28                 | 74.80         | 26.45     | 10.03                | 109.66   | 10.93                   | 10.47         | 3.70      |
| CC040/TauUnc  | Experimental | 7 | -5.37              | 55.68    | -10.37                  | 7.46          | 2.82      | -24.53              | 177.63   | -7.24                   | 13.33         | 5.04      | 8.11                 | 45.09    | 5.56                    | 6.72          | 2.54      |
| CC041/TauUnc  | Experimental | 6 | -6.43              | 68.22    | -10.60                  | 8.26          | 3.37      | -11.77              | 1307.25  | -111.10                 | 36.16         | 14.76     | 4.88                 | 71.00    | 14.54                   | 8.43          | 3.44      |
| CC042/GeniUnc | Experimental | 5 | -5.21              | 25.76    | -4.95                   | 5.08          | 2.27      | -49.98              | 470.84   | -9.42                   | 21.70         | 9.70      | 8.04                 | 29.33    | 3.65                    | 5.42          | 2.42      |
| CC043/GeniUnc | Experimental | 8 | -3.81              | 28.77    | -7.54                   | 5.36          | 1.90      | -8.23               | 369.16   | -44.85                  | 19.21         | 6.79      | 3.99                 | 24.99    | 6.26                    | 5.00          | 1.77      |
| CC072/TauUnc  | Experimental | 8 | 4.35               | 173.68   | 39.94                   | 13.18         | 4.66      | 19.69               | 5309.06  | 269.65                  | 72.86         | 25.76     | -0.95                | 105.86   | -111.75                 | 10.29         | 3.64      |

**Supporting Table 5.** Descriptive statistics for physical activity traits in the experimental cohort across 13 CC strains.

| CCStrain      | Treatment    | n | Mean Distance Days 11-12 |          |                         |               |           | Mean Duration Days 11-12 |           |                         |               |           | Mean Speed Days 11-12 |          |                         |               |           |
|---------------|--------------|---|--------------------------|----------|-------------------------|---------------|-----------|--------------------------|-----------|-------------------------|---------------|-----------|-----------------------|----------|-------------------------|---------------|-----------|
|               |              |   | Mean                     | Variance | Coefficient of Variance | Std Deviation | Std Error | Mean                     | Variance  | Coefficient of Variance | Std Deviation | Std Error | Mean                  | Variance | Coefficient of Variance | Std Deviation | Std Error |
| CC001/Unc     | Experimental | 8 | 3.84                     | 3.95     | 1.03                    | 1.99          | 0.70      | 258.75                   | 11,878.50 | 45.91                   | 108.99        | 38.53     | 14.20                 | 3.60     | 0.25                    | 1.90          | 0.67      |
| CC002/Unc     | Experimental | 8 | 4.49                     | 2.06     | 0.46                    | 1.44          | 0.51      | 248.63                   | 4,647.84  | 18.69                   | 68.18         | 24.10     | 17.79                 | 8.07     | 0.45                    | 2.84          | 1.00      |
| CC004/TauUnc  | Experimental | 5 | 7.00                     | 4.89     | 0.70                    | 2.21          | 0.99      | 345.30                   | 6,914.95  | 20.03                   | 83.16         | 37.19     | 19.81                 | 8.53     | 0.43                    | 2.92          | 1.31      |
| CC030/GeniUnc | Experimental | 8 | 2.78                     | 1.52     | 0.55                    | 1.23          | 0.44      | 181.36                   | 4,121.14  | 22.72                   | 64.20         | 22.70     | 14.86                 | 7.43     | 0.50                    | 2.73          | 0.96      |
| CC032/GeniUnc | Experimental | 8 | 3.47                     | 3.93     | 1.13                    | 1.98          | 0.70      | 348.06                   | 31,489.03 | 90.47                   | 177.45        | 62.74     | 9.16                  | 6.53     | 0.71                    | 2.56          | 0.90      |
| CC033/GeniUnc | Experimental | 8 | 5.20                     | 4.80     | 0.92                    | 2.19          | 0.77      | 280.50                   | 16,884.64 | 60.19                   | 129.94        | 45.94     | 18.68                 | 10.47    | 0.56                    | 3.24          | 1.14      |
| CC037/TauUnc  | Experimental | 6 | 6.65                     | 9.81     | 1.47                    | 3.13          | 1.28      | 362.33                   | 15,623.57 | 43.12                   | 124.99        | 51.03     | 17.31                 | 19.60    | 1.13                    | 4.43          | 1.81      |
| CC039/Unc     | Experimental | 8 | 2.83                     | 0.92     | 0.32                    | 0.96          | 0.34      | 261.81                   | 3,294.92  | 12.59                   | 57.40         | 20.29     | 11.01                 | 12.93    | 1.17                    | 3.60          | 1.27      |
| CC040/TauUnc  | Experimental | 7 | 6.49                     | 8.85     | 1.36                    | 2.98          | 1.12      | 345.36                   | 9,620.48  | 27.86                   | 98.08         | 37.07     | 18.80                 | 32.03    | 1.70                    | 5.66          | 2.14      |
| CC041/TauUnc  | Experimental | 6 | 1.05                     | 3.83     | 3.65                    | 1.96          | 0.80      | 89.08                    | 11,416.94 | 128.16                  | 106.85        | 43.62     | 5.90                  | 31.62    | 5.36                    | 5.62          | 2.30      |
| CC042/GeniUnc | Experimental | 5 | 4.77                     | 12.19    | 2.56                    | 3.49          | 1.56      | 301.20                   | 37,796.83 | 125.49                  | 194.41        | 86.94     | 12.26                 | 51.39    | 4.19                    | 7.17          | 3.21      |
| CC043/GeniUnc | Experimental | 8 | 3.81                     | 7.76     | 2.04                    | 2.79          | 0.98      | 208.31                   | 14,197.07 | 68.15                   | 119.15        | 42.13     | 14.93                 | 66.16    | 4.43                    | 8.13          | 2.88      |
| CC072/TauUnc  | Experimental | 8 | 4.45                     | 19.42    | 4.37                    | 4.41          | 1.56      | 284.94                   | 57,888.53 | 203.16                  | 240.60        | 85.07     | 10.32                 | 55.86    | 5.41                    | 7.47          | 2.64      |

**Supporting Table 6.** Descriptive statistics for cumulative body mass and composition response over eight weeks of treatment in young CC002/Unc and CC037/TauUnc females.

| CC Strain    | Treatment    | Timepoint | n | Cumulative Body Mass Response |          |                         |               |           | Cumulative Body Fat % Response |          |                         |               |           | Cumulative Lean Mass % Response |          |                         |               |           |
|--------------|--------------|-----------|---|-------------------------------|----------|-------------------------|---------------|-----------|--------------------------------|----------|-------------------------|---------------|-----------|---------------------------------|----------|-------------------------|---------------|-----------|
|              |              |           |   | Mean                          | Variance | Coefficient of Variance | Std Deviation | Std Error | Mean                           | Variance | Coefficient of Variance | Std Deviation | Std Error | Mean                            | Variance | Coefficient of Variance | Std Deviation | Std Error |
| CC002/Unc    | Control      | 1         | 3 | 4.02                          | 2.66     | 0.66                    | 1.63          | 0.94      | 9.21                           | 763.23   | 82.89                   | 27.63         | 15.95     | -1.28                           | 3.87     | -3.02                   | 1.97          | 1.14      |
| CC002/Unc    | Control      | 2         | 3 | 3.88                          | 5.02     | 1.29                    | 2.24          | 1.29      | 16.90                          | 1,506.17 | 89.15                   | 38.81         | 22.41     | -2.64                           | 12.22    | -4.64                   | 3.50          | 2.02      |
| CC002/Unc    | Control      | 3         | 3 | 4.66                          | 9.49     | 2.04                    | 3.08          | 1.78      | 23.63                          | 1,215.70 | 51.44                   | 34.87         | 20.13     | -3.19                           | 10.28    | -3.22                   | 3.21          | 1.85      |
| CC002/Unc    | Control      | 4         | 3 | 10.47                         | 52.31    | 5.00                    | 7.23          | 4.18      | 30.92                          | 1,673.27 | 54.11                   | 40.91         | 23.62     | -4.46                           | 9.63     | -2.16                   | 3.10          | 1.79      |
| CC002/Unc    | Experimental | 1         | 9 | 2.11                          | 13.41    | 6.34                    | 3.66          | 1.22      | 28.94                          | 1,018.77 | 35.21                   | 31.92         | 10.64     | -2.55                           | 11.63    | -4.55                   | 3.41          | 1.14      |
| CC002/Unc    | Experimental | 2         | 9 | -0.11                         | 11.02    | -104.03                 | 3.32          | 1.11      | 20.30                          | 585.70   | 28.85                   | 24.20         | 8.07      | -2.30                           | 5.23     | -2.27                   | 2.29          | 0.76      |
| CC002/Unc    | Experimental | 3         | 9 | -0.07                         | 30.55    | -467.03                 | 5.53          | 1.84      | 25.61                          | 1,221.03 | 47.68                   | 34.94         | 11.65     | -1.98                           | 20.35    | -10.26                  | 4.51          | 1.50      |
| CC002/Unc    | Experimental | 4         | 9 | 3.97                          | 47.43    | 11.94                   | 6.89          | 2.30      | 31.95                          | 1,067.06 | 33.39                   | 32.67         | 10.89     | -2.67                           | 12.15    | -4.54                   | 3.49          | 1.16      |
| CC037/TauUnc | Control      | 1         | 5 | 4.09                          | 31.29    | 7.64                    | 5.59          | 2.50      | 8.65                           | 451.28   | 52.20                   | 21.24         | 9.50      | -0.98                           | 10.34    | -10.59                  | 3.22          | 1.44      |
| CC037/TauUnc | Control      | 2         | 5 | 2.02                          | 87.05    | 43.02                   | 9.33          | 4.17      | -0.77                          | 903.66   | -1,170.73               | 30.06         | 13.44     | 0.40                            | 18.22    | 45.91                   | 4.27          | 1.91      |
| CC037/TauUnc | Control      | 3         | 5 | 4.35                          | 91.65    | 21.05                   | 9.57          | 4.28      | 19.04                          | 1,393.71 | 73.22                   | 37.33         | 16.70     | -2.03                           | 24.58    | -12.08                  | 4.96          | 2.22      |
| CC037/TauUnc | Control      | 4         | 5 | 5.52                          | 74.65    | 13.53                   | 8.64          | 3.86      | 14.77                          | 837.61   | 56.71                   | 28.94         | 12.94     | -1.57                           | 22.28    | -14.17                  | 4.72          | 2.11      |
| CC037/TauUnc | Experimental | 1         | 7 | 4.66                          | 39.03    | 8.38                    | 6.25          | 2.36      | 6.68                           | 296.53   | 44.38                   | 17.22         | 6.51      | -1.62                           | 6.60     | -4.08                   | 2.57          | 0.97      |
| CC037/TauUnc | Experimental | 2         | 7 | 5.12                          | 29.80    | 5.83                    | 5.46          | 2.06      | -5.60                          | 136.33   | -24.36                  | 11.68         | 4.41      | -0.40                           | 4.59     | -11.43                  | 2.14          | 0.81      |
| CC037/TauUnc | Experimental | 3         | 7 | 5.55                          | 18.08    | 3.26                    | 4.25          | 1.61      | 17.88                          | 706.26   | 39.50                   | 26.58         | 10.04     | -2.98                           | 3.96     | -1.33                   | 1.99          | 0.75      |
| CC037/TauUnc | Experimental | 4         | 7 | 4.50                          | 48.58    | 10.80                   | 6.97          | 2.63      | 0.19                           | 407.91   | 2,145.86                | 20.20         | 7.63      | 0.14                            | 14.66    | 106.55                  | 3.83          | 1.45      |

**Supporting Table 7.** Descriptive statistics of physical activity traits in CC002/Unc and CC037/TauUnc young females.

| CC Strain    | Treatment    | Timepoint | n | Total Distance (km) |          |                         |               |           | Total Duration (1-min) |              |                         |               |           | Mean Speed (m/min) |          |                         |               |           |
|--------------|--------------|-----------|---|---------------------|----------|-------------------------|---------------|-----------|------------------------|--------------|-------------------------|---------------|-----------|--------------------|----------|-------------------------|---------------|-----------|
|              |              |           |   | Mean                | Variance | Coefficient of Variance | Std Deviation | Std Error | Mean                   | Variance     | Coefficient of Variance | Std Deviation | Std Error | Mean               | Variance | Coefficient of Variance | Std Deviation | Std Error |
| CC002/Unc    | Experimental | 1         | 9 | 49.66               | 415.77   | 8.37                    | 20.39         | 6.80      | 3,485.89               | 625,308.36   | 179.38                  | 790.76        | 263.59    | 13.38              | 13.50    | 1.01                    | 3.67          | 1.22      |
| CC002/Unc    | Experimental | 2         | 9 | 52.42               | 770.45   | 14.70                   | 27.76         | 9.25      | 3,487.44               | 1,041,438.53 | 298.63                  | 1,020.51      | 340.17    | 14.41              | 16.65    | 1.16                    | 4.08          | 1.36      |
| CC002/Unc    | Experimental | 3         | 9 | 32.01               | 111.79   | 3.49                    | 10.57         | 3.52      | 2,434.67               | 177,645.50   | 72.97                   | 421.48        | 140.49    | 13.09              | 14.19    | 1.08                    | 3.77          | 1.26      |
| CC002/Unc    | Experimental | 4         | 9 | 29.77               | 220.83   | 7.42                    | 14.86         | 4.95      | 2,315.56               | 516,770.03   | 223.17                  | 718.87        | 239.62    | 12.59              | 14.42    | 1.15                    | 3.80          | 1.27      |
| CC037/TauUnc | Experimental | 1         | 7 | 72.13               | 752.68   | 10.44                   | 27.44         | 10.37     | 4,297.86               | 860,606.48   | 200.24                  | 927.69        | 350.63    | 15.50              | 18.30    | 1.18                    | 4.28          | 1.62      |
| CC037/TauUnc | Experimental | 2         | 7 | 95.22               | 660.17   | 6.93                    | 25.69         | 9.71      | 4,932.43               | 871,797.95   | 176.75                  | 933.70        | 352.91    | 18.15              | 18.54    | 1.02                    | 4.31          | 1.63      |
| CC037/TauUnc | Experimental | 3         | 7 | 87.94               | 473.71   | 5.39                    | 21.76         | 8.23      | 4,319.86               | 248,753.14   | 57.58                   | 498.75        | 188.51    | 20.14              | 13.71    | 0.68                    | 3.70          | 1.40      |
| CC037/TauUnc | Experimental | 4         | 7 | 82.23               | 349.63   | 4.25                    | 18.70         | 7.07      | 3,998.43               | 163,387.62   | 40.86                   | 404.21        | 152.78    | 20.10              | 13.06    | 0.65                    | 3.61          | 1.37      |

**Supporting Table 8.** Descriptive statistics for body mass and composition response across four CC strains, both sexes and three exercise training programs.

| CC Strain     | Sex | Intensity | n  | Body Mass Response |          |                         |               |           | Body Fat % Response |          |                         |               |           | Lean Mass % Response |          |                         |               |           |
|---------------|-----|-----------|----|--------------------|----------|-------------------------|---------------|-----------|---------------------|----------|-------------------------|---------------|-----------|----------------------|----------|-------------------------|---------------|-----------|
|               |     |           |    | Mean               | Variance | Coefficient of Variance | Std Deviation | Std Error | Mean                | Variance | Coefficient of Variance | Std Deviation | Std Error | Mean                 | Variance | Coefficient of Variance | Std Deviation | Std Error |
| CC002/Unc     | F   | HIIT      | 14 | 11.68              | 44.22    | 3.79                    | 6.65          | 1.78      | -7.53               | 565.02   | -75.07                  | 23.77         | 6.35      | 0.34                 | 11.39    | 33.87                   | 3.37          | 0.90      |
| CC002/Unc     | F   | MICT      | 16 | 11.28              | 46.33    | 4.11                    | 6.81          | 1.70      | 15.84               | 1,146.68 | 72.39                   | 33.86         | 8.47      | -2.25                | 20.83    | -9.28                   | 4.56          | 1.14      |
| CC002/Unc     | F   | NE        | 8  | 15.79              | 7.78     | 0.49                    | 2.79          | 0.99      | 16.85               | 555.60   | 32.98                   | 23.57         | 8.33      | -2.27                | 6.91     | -3.05                   | 2.63          | 0.93      |
| CC002/Unc     | M   | HIIT      | 6  | 6.76               | 9.45     | 1.40                    | 3.07          | 1.26      | -15.18              | 471.42   | -31.06                  | 21.71         | 8.86      | -0.70                | 4.23     | -6.08                   | 2.06          | 0.84      |
| CC002/Unc     | M   | MICT      | 8  | 7.54               | 10.80    | 1.43                    | 3.29          | 1.16      | -13.80              | 696.30   | -50.47                  | 26.39         | 9.33      | 0.66                 | 1.01     | 1.53                    | 1.00          | 0.36      |
| CC002/Unc     | M   | NE        | 7  | 8.64               | 33.43    | 3.87                    | 5.78          | 2.19      | -9.85               | 181.14   | -18.39                  | 13.46         | 5.09      | 0.08                 | 4.76     | 62.36                   | 2.18          | 0.82      |
| CC013/GeniUnc | F   | HIIT      | 4  | 3.58               | 34.07    | 9.52                    | 5.84          | 2.92      | 13.34               | 523.78   | 39.25                   | 22.89         | 11.44     | -1.16                | 2.09     | -1.79                   | 1.44          | 0.72      |
| CC013/GeniUnc | F   | MICT      | 8  | 5.09               | 11.11    | 2.18                    | 3.33          | 1.18      | 2.54                | 1,186.18 | 466.31                  | 34.44         | 12.18     | -0.71                | 3.65     | -5.12                   | 1.91          | 0.68      |
| CC013/GeniUnc | F   | NE        | 8  | 12.83              | 15.18    | 1.18                    | 3.90          | 1.38      | 47.35               | 3,024.06 | 63.87                   | 54.99         | 19.44     | -2.52                | 5.24     | -2.08                   | 2.29          | 0.81      |
| CC013/GeniUnc | M   | HIIT      | 8  | 4.11               | 11.14    | 2.71                    | 3.34          | 1.18      | 20.78               | 1,948.33 | 93.77                   | 44.14         | 15.61     | -1.53                | 3.30     | -2.16                   | 1.82          | 0.64      |
| CC013/GeniUnc | M   | MICT      | 8  | 8.41               | 49.16    | 5.84                    | 7.01          | 2.48      | 9.59                | 2,065.23 | 215.24                  | 45.44         | 16.07     | -1.26                | 6.71     | -5.32                   | 2.59          | 0.92      |
| CC013/GeniUnc | M   | NE        | 8  | 15.83              | 17.08    | 1.08                    | 4.13          | 1.46      | 37.52               | 2,054.29 | 54.76                   | 45.32         | 16.02     | -2.42                | 4.29     | -1.78                   | 2.07          | 0.73      |
| CC027/GeniUnc | F   | HIIT      | 14 | 6.12               | 18.34    | 3.00                    | 4.28          | 1.14      | -1.69               | 1,782.88 | -1,056.28               | 42.22         | 11.28     | -1.45                | 3.41     | -2.36                   | 1.85          | 0.49      |
| CC027/GeniUnc | F   | MICT      | 15 | 7.18               | 13.38    | 1.86                    | 3.66          | 0.94      | 29.77               | 3,627.30 | 121.86                  | 60.23         | 15.55     | -2.54                | 4.74     | -1.87                   | 2.18          | 0.56      |
| CC027/GeniUnc | F   | NE        | 8  | 15.69              | 24.30    | 1.55                    | 4.93          | 1.74      | -8.24               | 2,022.77 | -245.37                 | 44.98         | 15.90     | 0.25                 | 2.47     | 9.79                    | 1.57          | 0.56      |
| CC027/GeniUnc | M   | HIIT      | 11 | 3.70               | 14.95    | 4.04                    | 3.87          | 1.17      | 37.36               | 7,058.99 | 188.93                  | 84.02         | 25.33     | -2.40                | 13.20    | -5.51                   | 3.63          | 1.10      |
| CC027/GeniUnc | M   | MICT      | 11 | 6.20               | 21.81    | 3.52                    | 4.67          | 1.41      | 12.63               | 1,989.01 | 157.45                  | 44.60         | 13.45     | -1.72                | 10.18    | -5.91                   | 3.19          | 0.96      |
| CC027/GeniUnc | M   | NE        | 8  | 14.61              | 18.06    | 1.24                    | 4.25          | 1.50      | 38.68               | 5,447.14 | 140.83                  | 73.80         | 26.09     | -0.78                | 2.66     | -3.43                   | 1.63          | 0.58      |
| CC037/TauUnc  | F   | HIIT      | 15 | 3.74               | 38.43    | 10.27                   | 6.20          | 1.60      | 13.68               | 2,118.10 | 154.83                  | 46.02         | 11.88     | -2.12                | 12.55    | -5.92                   | 3.54          | 0.91      |
| CC037/TauUnc  | F   | MICT      | 15 | 8.17               | 38.67    | 4.73                    | 6.22          | 1.61      | 78.98               | 3,900.85 | 49.39                   | 62.46         | 16.13     | -8.46                | 23.65    | -2.80                   | 4.86          | 1.26      |
| CC037/TauUnc  | F   | NE        | 7  | 10.29              | 23.78    | 2.31                    | 4.88          | 1.84      | 38.34               | 1,583.78 | 41.31                   | 39.80         | 15.04     | -3.49                | 12.90    | -3.69                   | 3.59          | 1.36      |
| CC037/TauUnc  | M   | HIIT      | 11 | 8.37               | 42.83    | 5.12                    | 6.54          | 1.97      | 26.14               | 1,410.58 | 53.96                   | 37.56         | 11.32     | -3.36                | 24.44    | -7.27                   | 4.94          | 1.49      |
| CC037/TauUnc  | M   | MICT      | 11 | 9.30               | 19.86    | 2.14                    | 4.46          | 1.34      | 36.31               | 1,576.17 | 43.41                   | 39.70         | 11.97     | -3.57                | 19.01    | -5.32                   | 4.36          | 1.31      |
| CC037/TauUnc  | M   | NE        | 8  | 9.54               | 29.66    | 3.11                    | 5.45          | 1.93      | 15.26               | 267.58   | 17.54                   | 16.36         | 5.78      | -1.89                | 1.63     | -0.86                   | 1.28          | 0.45      |
