# Supplementary material
Source: publisher figshare collection journal article supplement (https://wiley.figshare.com/articles/dataset/_/6220436)
Supplement: Supplementary file 1 [file 1 › zh7-PG-00131-2017-s05.pdf]

**Supporting Table 9** Experiment 1 sample size by treatment and strain

| Experiment 1 - Sample Size |         |              |
|----------------------------|---------|--------------|
| Strain                     | Control | Experimental |
| CC001/Unc                  | 7       | 8            |
| CC002/Unc                  | 6       | 8            |
| CC004/TauUnc               | 5       | 5            |
| CC030/GeniUnc              | 5       | 8            |
| CC032/GeniUnc              | 6       | 8            |
| CC033/GeniUnc              | 7       | 8            |
| CC037/TauUnc               | 6       | 6            |
| CC039/Unc                  | 7       | 8            |
| CC040/TauUnc               | 8       | 7            |
| CC041/TauUnc               | 4       | 6            |
| CC042/GeniUnc              | 5       | 5            |
| CC043/GeniUnc              | 7       | 8            |
| CC072/TauUnc               | 7       | 8            |

**Supporting Table 10** Experiment 2 sample size by treatment and strain

| Experiment 2 - Sample Size |         |              |
|----------------------------|---------|--------------|
| Strain                     | Control | Experimental |
| CC002/Unc                  | 3       | 9            |
| CC037/TauUnc               | 5       | 7            |

**Supporting Table 11** Experiment 3 sample size by treatment, sex and strain. Non compliant mice are reported in ( ) and are not included in sample sizes or data analysis.

| Experiment 3 - Sample Size |               |        |        |    |
|----------------------------|---------------|--------|--------|----|
| Sex                        | Strain        | HIIT   | MICT   | NE |
| F                          | CC002/Unc     | 14 (2) | 16     | 8  |
|                            | CC013/GeniUnc | 4 (3)  | 8      | 8  |
|                            | CC027/GeniUnc | 14 (2) | 15 (1) | 8  |
|                            | CC037/TauUnc  | 15     | 15     | 7  |
| M                          | CC002/Unc     | 6 (2)  | 8      | 7  |
|                            | CC013/GeniUnc | 8      | 8      | 8  |
|                            | CC027/GeniUnc | 11     | 11     | 8  |
|                            | CC037/TauUnc  | 11     | 11     | 8  |
